# Supplementary material
Source: publisher figshare collection journal article supplement (https://karger.figshare.com/ndownloader/files/28365873)
Supplement: Supplementary file 1 [file 28365873]

**Table S2:** Etiology

| **Etiology** | **n (%)** |
| --- | --- |
| **Alcohol** | 20 (27.8) |
| **HCV** | 13 (18.1) |
| **HBV** | 4 (5.6) |
| **Cryptogenic** | 14 (19.4) |
| **NASH** | 12 (16.7) |
| **Combinations**  HCV + alcohol | 4 (5.6) |
| **Others**  - Hemochromatosis  - PSC | 4 (5.6)  1 (1.4) |

NASH = nonalcoholic steatohepatitis

PSC = primary sclerosing cholangitis
